# Supplementary material
Source: publisher figshare collection journal article supplement (https://gsajournals.figshare.com/ndownloader/files/13687649)
Supplement: Supplementary file 1 [file 13687649]

**Table S14: *WHI2* *vs*. *whi2*∆ inhibitor phenotypes in five genetic backgrounds**

| Background | *WHI2* | *whi2*∆ | Ket | Cyh | Spi | Myx | Oli |
| --- | --- | --- | --- | --- | --- | --- | --- |
| YJM627 | YJM1641 | YSV233 | = | = | = | = | > |
| YJM195 | YJM1741 | YSV237 | = | = | = | > | > |
| YJM145 | YJM789 | YSV450 | ND | ND | ND | ND | > |
| YJM1443 | YJM1704 | YSV236 | = | = | > | > | > |
| S288c | YJM1763 | YSV240 | = | > | > | > | > |
